# Supplementary material for: Safety and efficacy of BAY1436032 in IDH1-mutant AML: phase I study results
Source: PubMed Central journal article supplement (PMC7584476; doi:10.1038/s41375-020-0996-5), 2020-07-30

1  
2  
3  
4  
5  
6  
7  
8  
9  
10

**Supplementary Information for:**

**Safety and efficacy of BAY1436032 in IDH1-mutant AML: Phase I study results**

Michael Heuser, Neil Palmisiano, Ioannis Mantzaris, Alice Mims, Courtney DiNardo,  
Lewis R. Silverman, Eunice S. Wang, Walter Fiedler, Claudia Baldus, Sebastian  
Schwind, Timothy Pardee, Alexander E. Perl, Charles Cai, Stefan Kaulfuss, Eleni  
Lagkadinou, Christine Rentzsch, Markus Wagner, Gary Wilkinson, Bingyan Wu, Michael  
Jeffers, Isabelle Genvresse, Alwin Krämer

## 11 SUPPLEMENTARY METHODS

12

### 13 **Pharmacokinetics: Determination of BAY1436032 in plasma**

14 Quantitative analysis of BAY1436032 (free acid) in plasma was determined using a fully  
15 validated method after protein precipitation with acetonitrile/0.4 mM ammonium acetate  
16 (pH 3, 80:20, v/v) containing the internal standard, followed by separation employing  
17 high-pressure liquid chromatography-tandem mass spectrometric detection (LC-MS/MS).  
18 The method validation and sample analysis were performed in compliance with the  
19 pertinent guidelines on Bioanalytical Method Validation of FDA (2001) and EMA (2011).  
20 Samples were stored at or below -15°C and analyzed within 135 days of sampling.  
21 Testing indicated that the BAY1436032 was stable for this period of time. Maximum drug  
22 concentration ( $C_{max}$ ), area under the concentration versus time curve from time 0 to  
23 8 hours ( $AUC_{(0-8)}$ ), and AUC from time 0 to 12 hours ( $AUC_{(0-12)}$ ) were calculated using the  
24 model-independent (compartment-free) method. The dose proportionality in the 300 mg  
25 to 1500 mg dose range was evaluated by performing explorative analyses of variance  
26 (ANOVA) on the log-transformed values of  $C_{max}$  and  $AUC_{(0-12)}$ , calculated from single and  
27 continuous BID dosing PK profiles.

28

### 29 **Pharmacodynamics: Determination of R-2HG in plasma**

30 Plasma R-2HG concentrations were measured by Eurofins using a qualified LC-MS/MS  
31 method with a lower limit of quantification (LLOQ) of 25 ng/mL. For assay validation  
32 purposes, plasma samples from 9 subjects with *wtIDH1* and *wtIDH2* cholangiocarcinoma  
33 who were tested showed a median R-2HG level of 44 ng/mL (32–64) and samples from

34 9 subjects with *mIDH1* cholangiocarcinoma showed a median R-2HG level of 181 ng/mL  
35 (43–1016).

36 **SUPPLEMENTARY TABLES**

37

38 **Supplementary Table S1. Main pharmacokinetic parameters in plasma following**  
39 **single and continuous BID administration of BAY1436032.**

|           |        | <b>C1-D1 (single-dose)</b>             |                                        |                                         |                                         |
|-----------|--------|----------------------------------------|----------------------------------------|-----------------------------------------|-----------------------------------------|
|           |        | <b>Cohort 1<br/>300 mg BID<br/>n=7</b> | <b>Cohort 2<br/>600 mg BID<br/>n=4</b> | <b>Cohort 3<br/>1200 mg BID<br/>n=7</b> | <b>Cohort 4<br/>1500 mg BID<br/>n=9</b> |
| $C_{max}$ | µg/L   | 1996 (106)                             | 3199 (46)                              | 5308 (143)                              | 9822 (52)                               |
| AUC(0-8)  | µg·h/L | 6597 (107)                             | 12520 (29)                             | 20663 (131)                             | 42160 (46)                              |
| AUC(0-12) | µg·h/L | 7435 (99)                              | 15186 (29)                             | 24837 (130)                             | 50285 (51)                              |

  

|                         |        | <b>C1-D15 (continuous BID dosing)</b> |                                |                                 |                                 |
|-------------------------|--------|---------------------------------------|--------------------------------|---------------------------------|---------------------------------|
|                         |        | <b>Cohort 1<br/>300 mg BID</b>        | <b>Cohort 2<br/>600 mg BID</b> | <b>Cohort 3<br/>1200 mg BID</b> | <b>Cohort 4<br/>1500 mg BID</b> |
| $C_{max,md}$            | µg/L   | 1878 (100), n=6                       | 5053 (75), n=4                 | 6047 (126), n=7                 | 9464 (74), n=7                  |
| AUC(0-8) <sub>md</sub>  | µg·h/L | 5925 (124), n=5                       | 22279 (101), n=3               | 22913 (140), n=6                | 33951 (84), n=5                 |
| AUC(0-12) <sub>md</sub> | µg·h/L | 6751 (131), n=5                       | 25366 (101), n=3               | 21829 (150), n=5                | 44548 (68), n=3                 |

40 Numbers represent geometric mean (CV).

41

42 Abbreviations - AUC: area under the concentration-time curve from zero to infinity after a single dose; AUC(0-8):AUC  
43 from time 0–8 h after a single dose; AUC(0-12):AUC from time 0–12 h after a single dose; AUC(0-8)<sub>md</sub>: AUC from time  
44 0–8 h after continuous BID dosing; AUC(0-12)<sub>md</sub>: AUC from time 0–12 h after continuous BID dosing; BID: twice daily;  
45  $C_{max}$ : maximum observed drug concentration in plasma after a single dose;  $C_{max,md}$ :  $C_{max}$  after continuous BID dosing;  
46 CV: coefficient of variation; n: number of subjects

47 **Supplementary Table S2. Per-subject summary of baseline *mIDH1* allele frequency, clinical outcome, and R-2HG**  
 48 **levels at baseline and during BAY1436032 treatment.**

| BAY1436032 dose                                 | Subject ID | Age/sex | <i>mIDH1</i> (% VAF) <sup>1</sup> | Clinical outcome <sup>2</sup> |                            | R-2HG <sup>3</sup> |                       |                                                     |
|-------------------------------------------------|------------|---------|-----------------------------------|-------------------------------|----------------------------|--------------------|-----------------------|-----------------------------------------------------|
|                                                 |            |         |                                   | Best response                 | Time on treatment (months) | Baseline (ng/mL)   | Best decrease (ng/mL) | Cycle-day of best decrease (% change from baseline) |
| <b>Cohort 1</b><br><b>300 mg</b><br><b>BID</b>  | 1          | 79/M    | R132C (44)                        | <b>SD</b>                     | 7.03                       | 9714               | 4057                  | C6-D1 (58)                                          |
|                                                 | 2          | 67/M    | R132H (49)                        | PD                            | 0.62                       | 4558               | 2196                  | C1-D8 (52)                                          |
|                                                 | 3          | 69/F    | R132C (10)                        | <b>SD</b>                     | 3.09                       | 2813               | 1526                  | C3-D1 (46)                                          |
|                                                 | 4          | 37/M    | R132H (10)                        | SD                            | 2.00                       | 78                 | 46                    | C1-D15 (41)                                         |
|                                                 | 5          | 86/F    | R132G (36)                        | MLFS                          | 5.98                       | 2914               | 259                   | C5-D1 (91)                                          |
|                                                 | 6          | 66/M    | R132C (48)                        | <b>SD</b>                     | 6.41                       | 14749              | 2653                  | C4-D15 (82)                                         |
|                                                 | 7          | 57/F    | R132H (38)                        | SD                            | 1.81                       | 1081               | 910                   | C1-D15 (16)                                         |
| <b>Cohort 2</b><br><b>600 mg</b><br><b>BID</b>  | 8          | 74/M    | R132G (23)                        | SD                            | 1.81                       | 837                | 529                   | C1-D8 (37)                                          |
|                                                 | 9          | 76/F    | R132C (41)                        | <b>SD</b>                     | 4.57                       | 3765               | 364                   | C5-D1 (90)                                          |
|                                                 | 10         | 51/M    | R132G (35)                        | PD                            | 3.32                       | 1981               | 491                   | C4-D1 (75)                                          |
|                                                 | 11         | 70/F    | R132C (27)                        | SD                            | 1.77                       | 1777               | 605                   | C1-D8 (66)                                          |
| <b>Cohort 3</b><br><b>1200 mg</b><br><b>BID</b> | 12         | 62/M    | R132C (28)                        | <b>SD</b>                     | 5.52                       | 1755               | 1482                  | C3-D1 (16)                                          |
|                                                 | 13         | 73/F    | R132L (37)                        | PR                            | 5.91                       | 3969               | 33                    | C4-D15 (99)                                         |
|                                                 | 14         | 70/M    | R132C (46)                        | <b>SD</b>                     | 5.52                       | 4207               | 2471                  | C3-D1 (41)                                          |
|                                                 | 15         | 83/F    | R132C (21)                        | SD                            | 1.11                       | 510                | 138                   | C1-D8 (73)                                          |
|                                                 | 16         | 69/F    | R132C (13)                        | CRp                           | 8.54                       | 5280               | 76                    | C8-D1 (99)                                          |
|                                                 | 17         | 82/M    | R132L (25)                        | SD                            | 3.02                       | 332                | 61                    | C1-D8 (82)                                          |
|                                                 | 18         | 42/F    | R132C (26)                        | <b>SD</b>                     | 3.42                       | 995                | 420                   | C1-D8 (58)                                          |
| <b>Cohort 4</b><br><b>1500 mg</b><br><b>BID</b> | 19         | 68/F    | R132S                             | SD                            | 2.07                       | 850                | 291                   | C1-D15 (66)                                         |
|                                                 | 20         | 67/F    | R132H (45)                        | PD                            | 0.99                       | 833                | 207                   | C1-D8 (75)                                          |
|                                                 | 21         | 27/F    | R132C (48)                        | PD                            | 0.49                       | 2025               | 1362                  | C1-D8 (33)                                          |
|                                                 | 22         | 52/F    | R132H (9)                         | PD                            | 0.85                       | 887                | 193                   | C1-D8 (78)                                          |
|                                                 | 23         | 69/M    | R132C (46)                        | SD                            | 2.37                       | 3599               | 265                   | C1-D8 (93)                                          |
|                                                 | 24         | 58/M    | R132C                             | MLFS                          | 3.88                       | 164                | 41                    | C4-D1 (75)                                          |
|                                                 | 25         | 78/M    | R132C (5)                         | <b>SD</b>                     | 6.24                       | 577                | 320                   | C1-D15 (45)                                         |
|                                                 | 26         | 70/F    | R132C (5)                         | SD                            | 2.10                       | 1060               | 401                   | C1-D8 (62)                                          |
|                                                 | 27         | 79/F    | R132S (6)                         | SD                            | 2.30                       | 800                | 375                   | C1-D15 (53)                                         |

49 <sup>1</sup> Results are from retrospective evaluation of baseline leukemic samples at a central laboratory via next-generation sequencing, except subjects 19 and 24 for whom  
 50 investigator-reported results are shown.

51 <sup>2</sup> Bone marrow efficacy assessments are performed at the start of each 28-day cycle. Best response is per Cheson criteria. Subjects who achieved a best response  
 52 of SD and remained stable for ≥2 consecutive assessments and on treatment for ≥3 months are indicated with bolded SD. Time on treatment is measured from first  
 53 to last dose of BAY1436032.

54 <sup>3</sup> R-2HG levels detected at baseline and at the time point showing the maximum R-2HG decrease from baseline are indicated. Plasma R-2HG levels determined at  
 55 the following time points were used for this analysis: pre-dose at baseline (C1-D1), C1-D8, C1-D15, D1 and D15 of subsequent cycles.

56 Abbreviations - CRp: complete remission with partial platelet recovery; MLFS: morphologic leukemia-free state; PD: progressive disease;  
 57 PR: partial remission; SD: stable disease; VAF: variant allele frequency  
 58

59  
60

**Supplementary Table S3. Treatment-emergent adverse events occurring in ≥10% of treated subjects.**

| TEAE                                  | CTCAE grade | Cohort 1<br>300 mg<br>BID<br>n=7 | Cohort 2<br>600 mg<br>BID<br>n=4 | Cohort 3<br>1200 mg<br>BID<br>n=7 | Cohort 4<br>1500 mg<br>BID<br>n=9 | Total<br>n=27 (%) |
|---------------------------------------|-------------|----------------------------------|----------------------------------|-----------------------------------|-----------------------------------|-------------------|
| Anaemia                               | Grade 3     | 0                                | 1                                | 3                                 | 0                                 | 4 (15)            |
|                                       | Grade 4     | 1                                | 0                                | 0                                 | 0                                 | 1 (4)             |
| Febrile neutropenia                   | Grade 3     | 2                                | 1                                | 2                                 | 2                                 | 7 (26)            |
| Leukocytosis                          | Grade 2     | 1                                | 0                                | 1                                 | 0                                 | 2 (7)             |
|                                       | Grade 3     | 1                                | 0                                | 0                                 | 1                                 | 2 (7)             |
| Thrombocytopenia                      | Grade 4     | 0                                | 0                                | 1                                 | 2                                 | 3 (11)            |
| Sinus tachycardia                     | Grade 1     | 2                                | 0                                | 0                                 | 1                                 | 3 (11)            |
| Abdominal pain upper                  | Grade 1     | 0                                | 0                                | 0                                 | 2                                 | 2 (7)             |
|                                       | Grade 2     | 0                                | 0                                | 0                                 | 1                                 | 1 (4)             |
| Constipation                          | Grade 1     | 0                                | 0                                | 1                                 | 3                                 | 4 (15)            |
|                                       | Grade 2     | 1                                | 0                                | 0                                 | 0                                 | 1 (4)             |
| Diarrhea                              | Grade 1     | 4                                | 0                                | 1                                 | 2                                 | 7 (26)            |
|                                       | Grade 2     | 0                                | 0                                | 2                                 | 1                                 | 3 (11)            |
| Nausea                                | Grade 1     | 1                                | 1                                | 2                                 | 1                                 | 5 (19)            |
|                                       | Grade 2     | 1                                | 0                                | 0                                 | 1                                 | 2 (7)             |
|                                       | Grade 3     | 0                                | 0                                | 0                                 | 2                                 | 2 (7)             |
| Vomiting                              | Grade 1     | 3                                | 1                                | 0                                 | 3                                 | 7 (26)            |
| Fatigue                               | Grade 1     | 2                                | 1                                | 0                                 | 1                                 | 4 (15)            |
|                                       | Grade 2     | 1                                | 0                                | 2                                 | 1                                 | 4 (15)            |
|                                       | Grade 3     | 1                                | 0                                | 0                                 | 2                                 | 3 (11)            |
| General physical health deterioration | Grade 3     | 0                                | 0                                | 0                                 | 2                                 | 2 (7)             |
|                                       | Grade 5     | 0                                | 0                                | 0                                 | 1                                 | 1 (4)             |
| Oedema peripheral                     | Grade 1     | 3                                | 1                                | 2                                 | 0                                 | 6 (22)            |
|                                       | Grade 3     | 1                                | 0                                | 0                                 | 1                                 | 2 (7)             |
| Pyrexia                               | Grade 1     | 0                                | 1                                | 1                                 | 2                                 | 4 (15)            |
|                                       | Grade 2     | 0                                | 1                                | 0                                 | 0                                 | 1 (4)             |
|                                       | Grade 3     | 0                                | 0                                | 0                                 | 3                                 | 3 (11)            |
| Gingivitis                            | Grade 1     | 2                                | 1                                | 0                                 | 0                                 | 3 (11)            |
| Lung infection                        | Grade 3     | 1                                | 1                                | 1                                 | 0                                 | 3 (11)            |
|                                       | Grade 5     | 1                                | 0                                | 0                                 | 0                                 | 1 (4)             |
| Pneumonia                             | Grade 1     | 0                                | 0                                | 0                                 | 1                                 | 1 (4)             |
|                                       | Grade 2     | 1                                | 0                                | 1                                 | 0                                 | 2 (7)             |
|                                       | Grade 3     | 1                                | 0                                | 1                                 | 1                                 | 3 (11)            |
| Pneumonia fungal                      | Grade 2     | 0                                | 0                                | 0                                 | 1                                 | 1 (4)             |
|                                       | Grade 3     | 0                                | 0                                | 0                                 | 1                                 | 1 (4)             |
|                                       | Grade 4     | 0                                | 0                                | 0                                 | 1                                 | 1 (4)             |

| TEAE                       | CTCAE grade | Cohort 1<br>300 mg<br>BID<br>n=7 | Cohort 2<br>600 mg<br>BID<br>n=4 | Cohort 3<br>1200 mg<br>BID<br>n=7 | Cohort 4<br>1500 mg<br>BID<br>n=9 | Total<br>n=27 (%) |
|----------------------------|-------------|----------------------------------|----------------------------------|-----------------------------------|-----------------------------------|-------------------|
| <b>Sepsis</b>              | Grade 4     | 2                                | 1                                | 0                                 | 0                                 | 3 (11)            |
|                            | Grade 5     | 1                                | 0                                | 0                                 | 1                                 | 2 (7)             |
| <b>Contusion</b>           | Grade 1     | 1                                | 0                                | 1                                 | 1                                 | 3 (11)            |
|                            | Grade 2     | 0                                | 0                                | 0                                 | 1                                 | 1 (4)             |
| <b>Fall</b>                | Grade 1     | 0                                | 1                                | 1                                 | 2                                 | 4 (15)            |
| <b>Weight decreased</b>    | Grade 1     | 2                                | 0                                | 1                                 | 0                                 | 3 (11)            |
|                            | Grade 2     | 0                                | 1                                | 2                                 | 0                                 | 3 (11)            |
|                            | Grade 3     | 0                                | 0                                | 0                                 | 1                                 | 1 (4)             |
| <b>Decreased appetite</b>  | Grade 1     | 3                                | 0                                | 0                                 | 2                                 | 5 (19)            |
|                            | Grade 2     | 1                                | 0                                | 1                                 | 1                                 | 3 (11)            |
|                            | Grade 3     | 0                                | 0                                | 0                                 | 1                                 | 1 (4)             |
| <b>Hyperkalaemia</b>       | Grade 1     | 1                                | 1                                | 0                                 | 0                                 | 2 (7)             |
|                            | Grade 4     | 0                                | 1                                | 0                                 | 0                                 | 1 (4)             |
| <b>Hyperuricaemia</b>      | Grade 1     | 0                                | 1                                | 2                                 | 1                                 | 4 (15)            |
|                            | Grade 3     | 0                                | 1                                | 0                                 | 0                                 | 1 (4)             |
| <b>Hypokalaemia</b>        | Grade 1     | 2                                | 0                                | 1                                 | 0                                 | 3 (11)            |
|                            | Grade 2     | 0                                | 0                                | 0                                 | 1                                 | 1 (4)             |
|                            | Grade 3     | 1                                | 0                                | 0                                 | 1                                 | 2 (7)             |
| <b>Hyponatraemia</b>       | Grade 1     | 2                                | 0                                | 0                                 | 0                                 | 2 (7)             |
|                            | Grade 3     | 0                                | 0                                | 0                                 | 1                                 | 1 (4)             |
| <b>Hypophosphataemia</b>   | Grade 1     | 0                                | 0                                | 0                                 | 1                                 | 1 (4)             |
|                            | Grade 2     | 1                                | 0                                | 0                                 | 1                                 | 2 (7)             |
| <b>Arthralgia</b>          | Grade 1     | 0                                | 0                                | 0                                 | 1                                 | 1 (4)             |
|                            | Grade 2     | 0                                | 0                                | 1                                 | 1                                 | 2 (7)             |
| <b>Pain in extremity</b>   | Grade 1     | 1                                | 0                                | 1                                 | 0                                 | 2 (7)             |
|                            | Grade 2     | 0                                | 0                                | 0                                 | 1                                 | 1 (4)             |
| <b>Headache</b>            | Grade 1     | 1                                | 0                                | 0                                 | 0                                 | 1 (4)             |
|                            | Grade 2     | 2                                | 0                                | 0                                 | 0                                 | 2 (7)             |
|                            | Grade 3     | 0                                | 0                                | 0                                 | 1                                 | 1 (4)             |
| <b>Anxiety</b>             | Grade 1     | 1                                | 0                                | 1                                 | 0                                 | 2 (7)             |
|                            | Grade 2     | 0                                | 0                                | 0                                 | 1                                 | 1 (4)             |
| <b>Acute kidney injury</b> | Grade 1     | 1                                | 0                                | 0                                 | 0                                 | 1 (4)             |
|                            | Grade 2     | 1                                | 0                                | 0                                 | 0                                 | 1 (4)             |
|                            | Grade 3     | 0                                | 1                                | 0                                 | 0                                 | 1 (4)             |
| <b>Haematuria</b>          | Grade 1     | 1                                | 0                                | 1                                 | 0                                 | 2 (7)             |
|                            | Grade 2     | 0                                | 1                                | 0                                 | 0                                 | 1 (4)             |
|                            | Grade 3     | 0                                | 0                                | 0                                 | 1                                 | 1 (4)             |
| <b>Cough</b>               | Grade 1     | 2                                | 1                                | 0                                 | 0                                 | 3 (11)            |
|                            | Grade 2     | 1                                | 0                                | 0                                 | 1                                 | 2 (7)             |

| TEAE                    | CTCAE grade | Cohort 1<br>300 mg<br>BID<br>n=7 | Cohort 2<br>600 mg<br>BID<br>n=4 | Cohort 3<br>1200 mg<br>BID<br>n=7 | Cohort 4<br>1500 mg<br>BID<br>n=9 | Total<br>n=27 (%) |
|-------------------------|-------------|----------------------------------|----------------------------------|-----------------------------------|-----------------------------------|-------------------|
| <b>Dyspnoea</b>         | Grade 1     | 2                                | 0                                | 1                                 | 1                                 | 4 (15)            |
|                         | Grade 2     | 1                                | 0                                | 1                                 | 0                                 | 2 (7)             |
|                         | Grade 3     | 2                                | 0                                | 0                                 | 1                                 | 3 (11)            |
| <b>Epistaxis</b>        | Grade 1     | 0                                | 1                                | 0                                 | 2                                 | 3 (11)            |
|                         | Grade 2     | 0                                | 0                                | 2                                 | 0                                 | 2 (7)             |
|                         | Grade 3     | 0                                | 1                                | 0                                 | 0                                 | 1 (4)             |
| <b>Productive cough</b> | Grade 1     | 0                                | 1                                | 1                                 | 0                                 | 2 (7)             |
|                         | Grade 2     | 0                                | 0                                | 0                                 | 1                                 | 1 (4)             |
| <b>Dry skin</b>         | Grade 1     | 2                                | 1                                | 1                                 | 1                                 | 5 (19)            |
| <b>Rash</b>             | Grade 1     | 0                                | 0                                | 1                                 | 0                                 | 1 (4)             |
|                         | Grade 2     | 0                                | 1                                | 0                                 | 2                                 | 3 (11)            |
| <b>Hypertension</b>     | Grade 2     | 0                                | 0                                | 0                                 | 2                                 | 2 (7)             |
|                         | Grade 3     | 0                                | 0                                | 1                                 | 0                                 | 1 (4)             |

61 Abbreviations – BID: twice-daily; CTCAE: common terminology criteria for adverse events; n: number of subjects;  
62 TEAE: treatment-emergent adverse event



63 **Supplementary Table S4. Baseline gene alterations in all subjects as determined**  
64 **by next-generation sequencing.**

65

66 *(Please see separate Table in Excel format)*

67 **SUPPLEMENTARY FIGURES**

68

69 **Supplementary Figure S1. Geometric mean plasma concentration-time profiles**  
70 **of BAY1436032 at dose levels of 300 mg to 1500 mg.** (A) Single administration on  
71 C1-D1; (B) Continuous BID dosing to C1-D15. Data is plotted on both linear and semi-  
72 logarithmic scales, with BAY1436032 concentration illustrated on the Y-axis and  
73 sampling time after drug administration on the X-axis. Cohorts are represented as  
74 follows: cohort 1 (300 mg BID) by black circles; cohort 2 (600 mg BID) by green  
75 squares; cohort 3 (1200 mg BID) by blue triangles; cohort 4 (1500 mg BID) by inverted  
76 red triangles. Error bars illustrate the geometric standard deviation. Values below  
77 LLOQ were substituted by 1/2 LLOQ for the calculation of statistics. Abbreviations - h:  
78 hour; LLOQ: lower limit of quantification; n: number of subjects.

Supplementary Figure S1

A

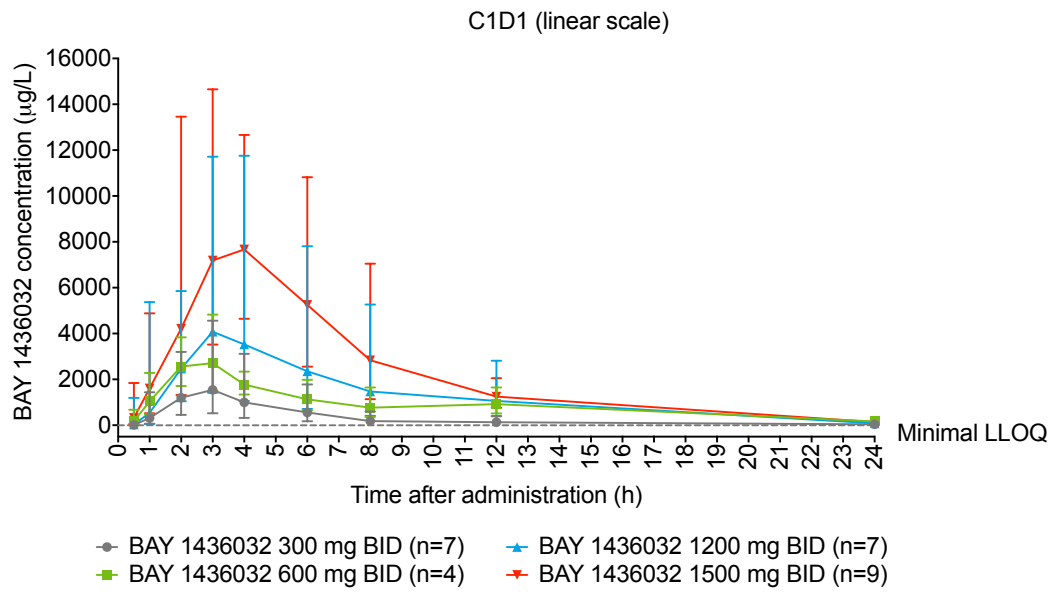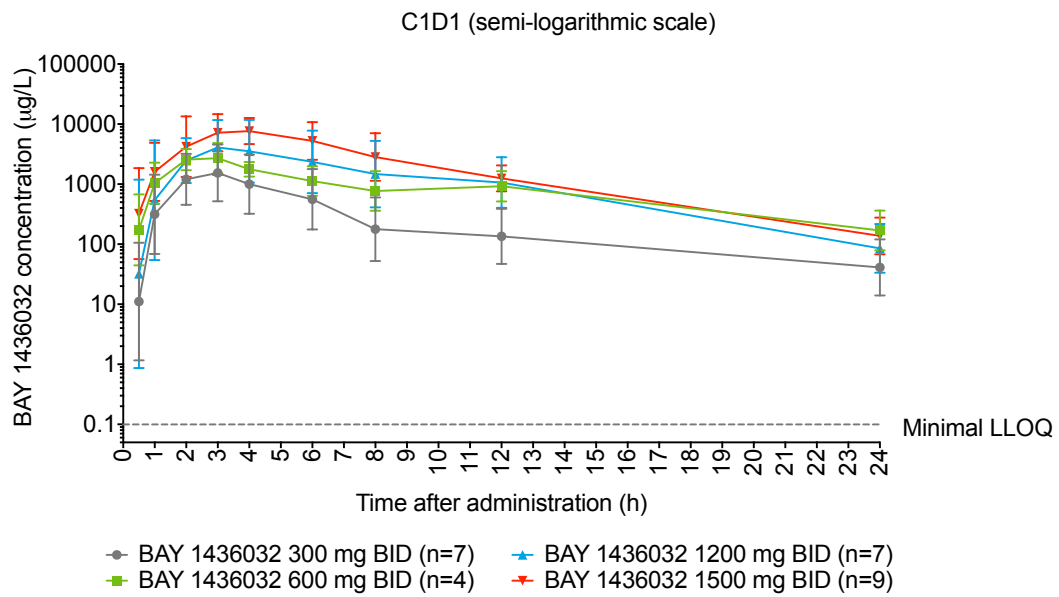

B

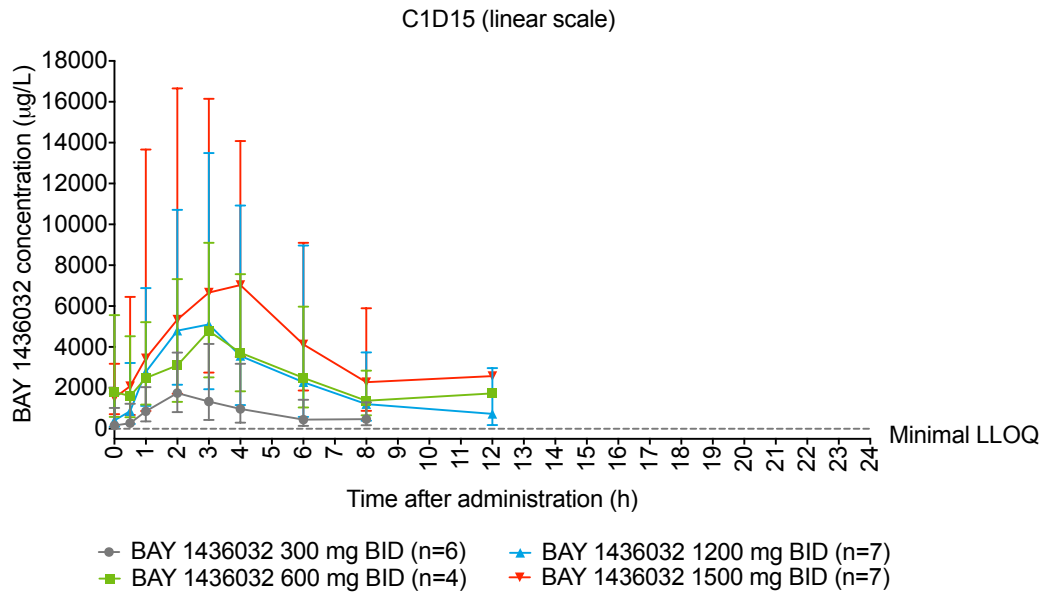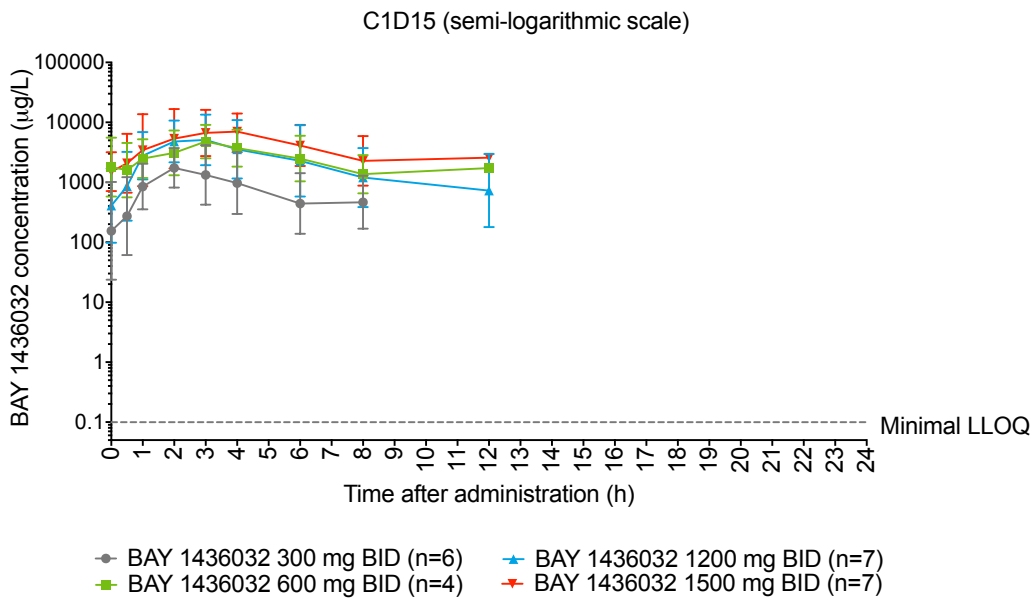

81 **Supplementary Figure S2. Neutrophil counts during BAY1436032 treatment.** All  
82 subjects with data available at each time point were included in the analysis.  
83 Neutrophils were quantified from blood samples obtained at the time points listed on  
84 the X-axis. Error bars indicate standard error of the mean. Abbreviations – n: number  
85 of subjects.

86

Supplementary Figure S2

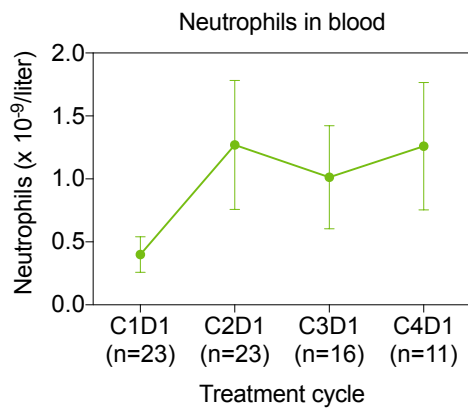

87

88 **Supplementary Figure S3. Blast percentages in bone marrow and peripheral**  
89 **blood from subjects who experienced stable disease with BAY1436032**  
90 **treatment.** The 8 subjects who experienced a best response of SD and remained  
91 stable  $\geq 2$  consecutive assessments and on BAY1436032 treatment for  $\geq 3$  months  
92 were included in the analysis. Error bars indicate standard error.

93

Supplementary Figure S3

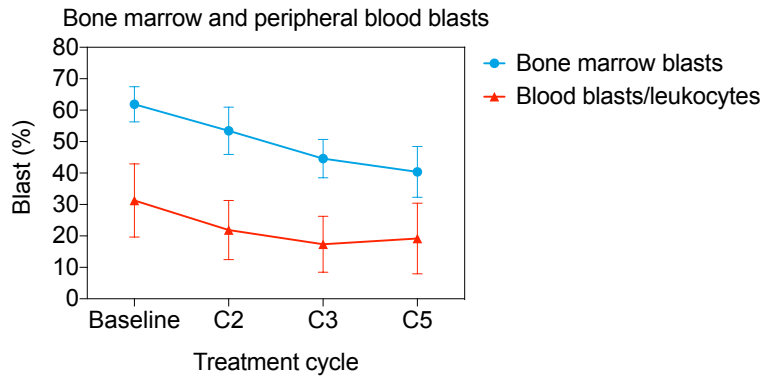

94

95 **Supplementary Figure S4. Per-subject blast percentages and R-2HG levels from**  
96 **subjects who experienced stable disease during BAY1436032 treatment.** The 8  
97 subjects who experienced a best response of SD and remained stable  $\geq 2$  consecutive  
98 assessments and on BAY1436032 treatment for  $\geq 3$  months are depicted. Blast  
99 percentages are shown on the left Y-axis, plasma R-2HG levels on the right Y-axis  
100 and treatment cycle number on the X-axis. Bone marrow blasts are illustrated with  
101 blue circles and peripheral blood blasts/leukocytes with red triangles. R-2HG levels  
102 are represented by gray bars and the R-2HG level associated with healthy individuals  
103 (138 ng/mL) is shown as squares connected by a dotted black line. Note that some  
104 data points are missing (e.g. the R-2HG value for subject 12 at C5).

Supplementary Figure S4

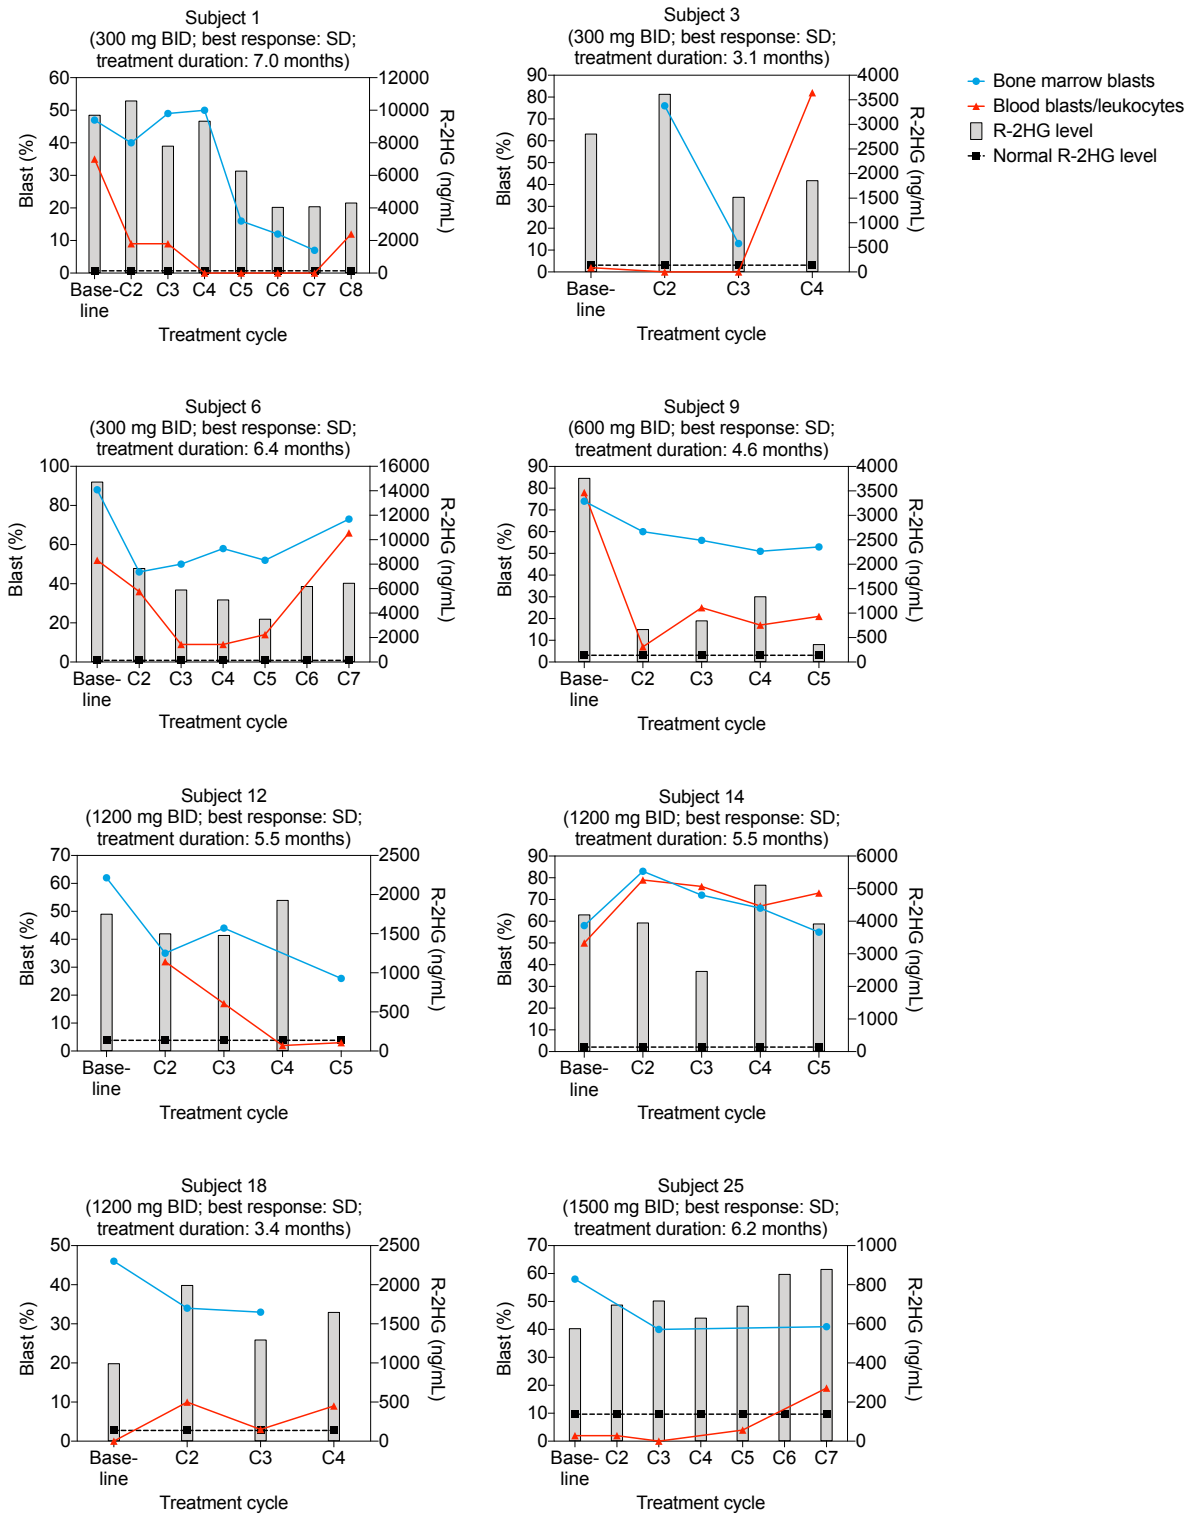



106 **Supplementary Figure S5. Longitudinal mutational analysis during BAY1436032**  
 107 **treatment.** Testing was performed on a subset of subjects and results are shown for  
 108 the only 3 subjects who had been on treatment for at least 3 full cycles of treatment  
 109 and had data available from multiple time points [baseline, during treatment, end-of-  
 110 treatment, (EOT)]. The alterations listed are considered known or likely pathogenic,  
 111 with the exceptions of those for *ATR* and *PIK3C2G* in subject 18. These alterations  
 112 are included since they were previously identified as somatic in cancer specimens and  
 113 the allele frequencies associated with these alterations in subject 18 are consistent  
 114 with their being somatic alterations. Note that *PIK3C2G* and *CREB2* show overlapping  
 115 variant allele frequency (VAF) values in subject 18. The *PDGFRB/TPM3* fusion and  
 116 *MLL* rearrangement/duplication detected in subjects 12 and 14 only at EOT were not  
 117 quantified for VAF and were assigned the VAF value of 50% in the graphs solely for  
 118 illustrative purposes.  
 119

Supplementary Figure S5

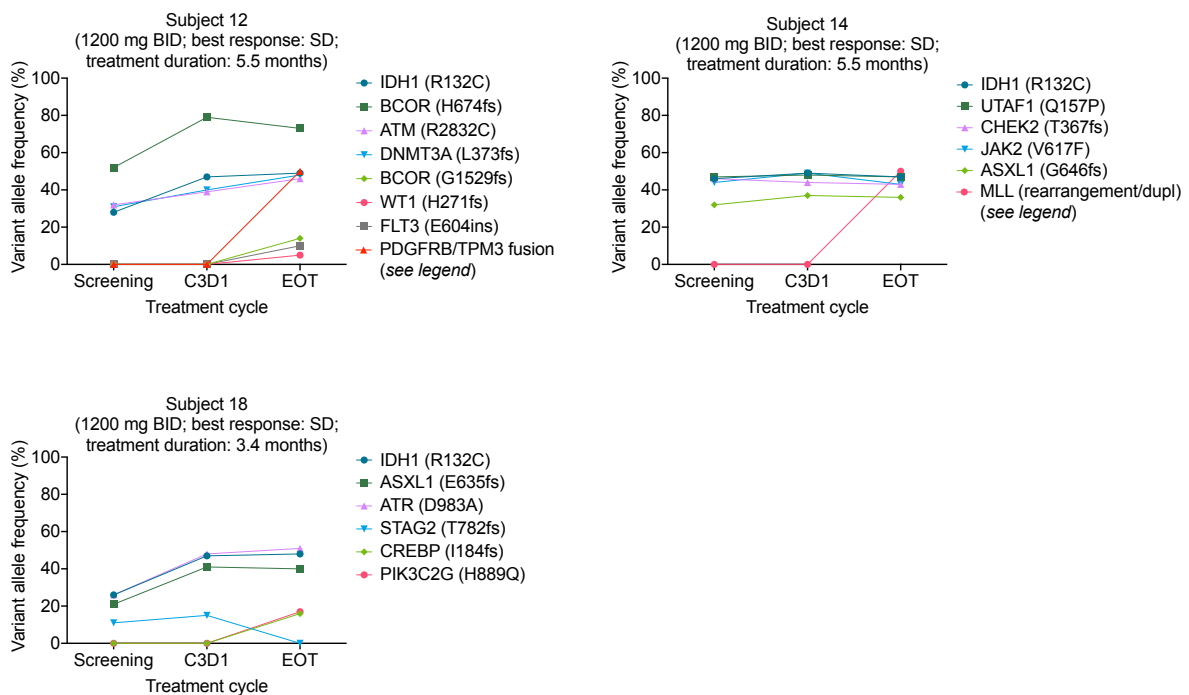

Supplement: 41375_2020_996_MOESM1_ESM.pdf [file 41375_2020_996_MOESM1_ESM.pdf]
